# Supplementary material for: Intramolecular interactions that control voltage sensitivity in the jShak1 potassium channel from Polyorchis penicillatus
Source: Oxford University Press journal article supplement (doi:10.1242/jeb.144089), 2016-01-01
Supplement: jeb144089supp.pdf [file jeb144089supp.pdf]

## Table S1

[Click here to Download Table S1](#)
